# Supplementary material
Source: PubMed Central journal article supplement (PMC2939143)

**SUPPLEMENTAL DATA for**

**Structure of a Venezuelan equine encephalitis virus assembly intermediate isolated from infected cells**

Kristen Lamb<sup>1</sup>, GL Lokesh<sup>1</sup>, Michael Sherman<sup>1,2</sup>, Stanley Watowich<sup>1,2\*</sup>

<sup>1</sup>Department of Biochemistry and Molecular Biology, <sup>2</sup>W. M. Keck Center for Virus Imaging, University of Texas Medical Branch, Galveston, TX 77555

**Supplemental Figure Legends**

**Suppl. Data Figure 1.** Three-dimensional reconstruction of a VEEV pre-viral nucleocapsid assembly state. All reconstructions are shown at the 3-fold axis of symmetry. (A) Pre-viral nucleocapsid reconstruction produced using an Auto3dem-generated starting model. (B) Similar to (A) but with a RCNMV map used as a starting model. (C) Similar to (A) but with a VEEV mature nucleocapsid map used as a starting model. (D) Similar to (A) but with a WEEV mature nucleocapsid map used as a starting model.

**Suppl. Data Figure 2.** Radial density plots of pre-viral nucleocapsid reconstructions produced from each of four starting models, (A) Auto-3dem-generated, (B) WEEV mature nucleocapsid, (C) VEEV mature nucleocapsid, and (D) RCNMV. Radii less than that at point (a) in (A-D) were attributed to RNA density, which is likely disordered. Points (a-e) were attributed to features within the pre-viral nucleocapsid reconstructions (A-D). (E) The radial density plot for VEEV mature nucleocapsid without RNA content at comparable resolution.

Suppl. Data Figure 1.

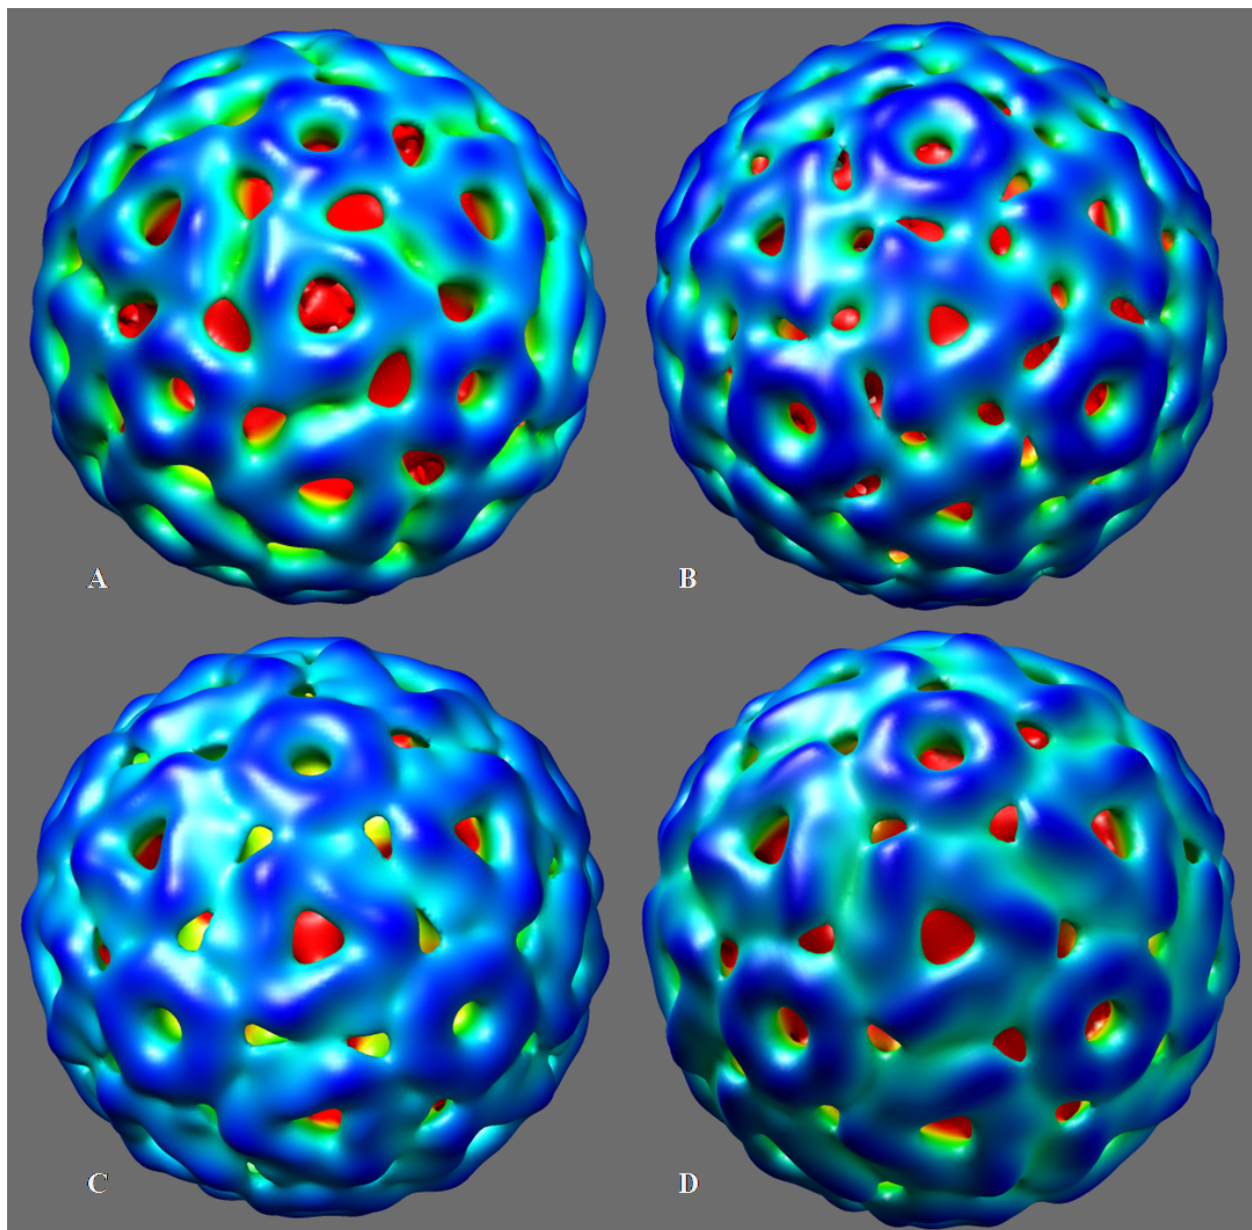

Suppl. Data Figure 2.

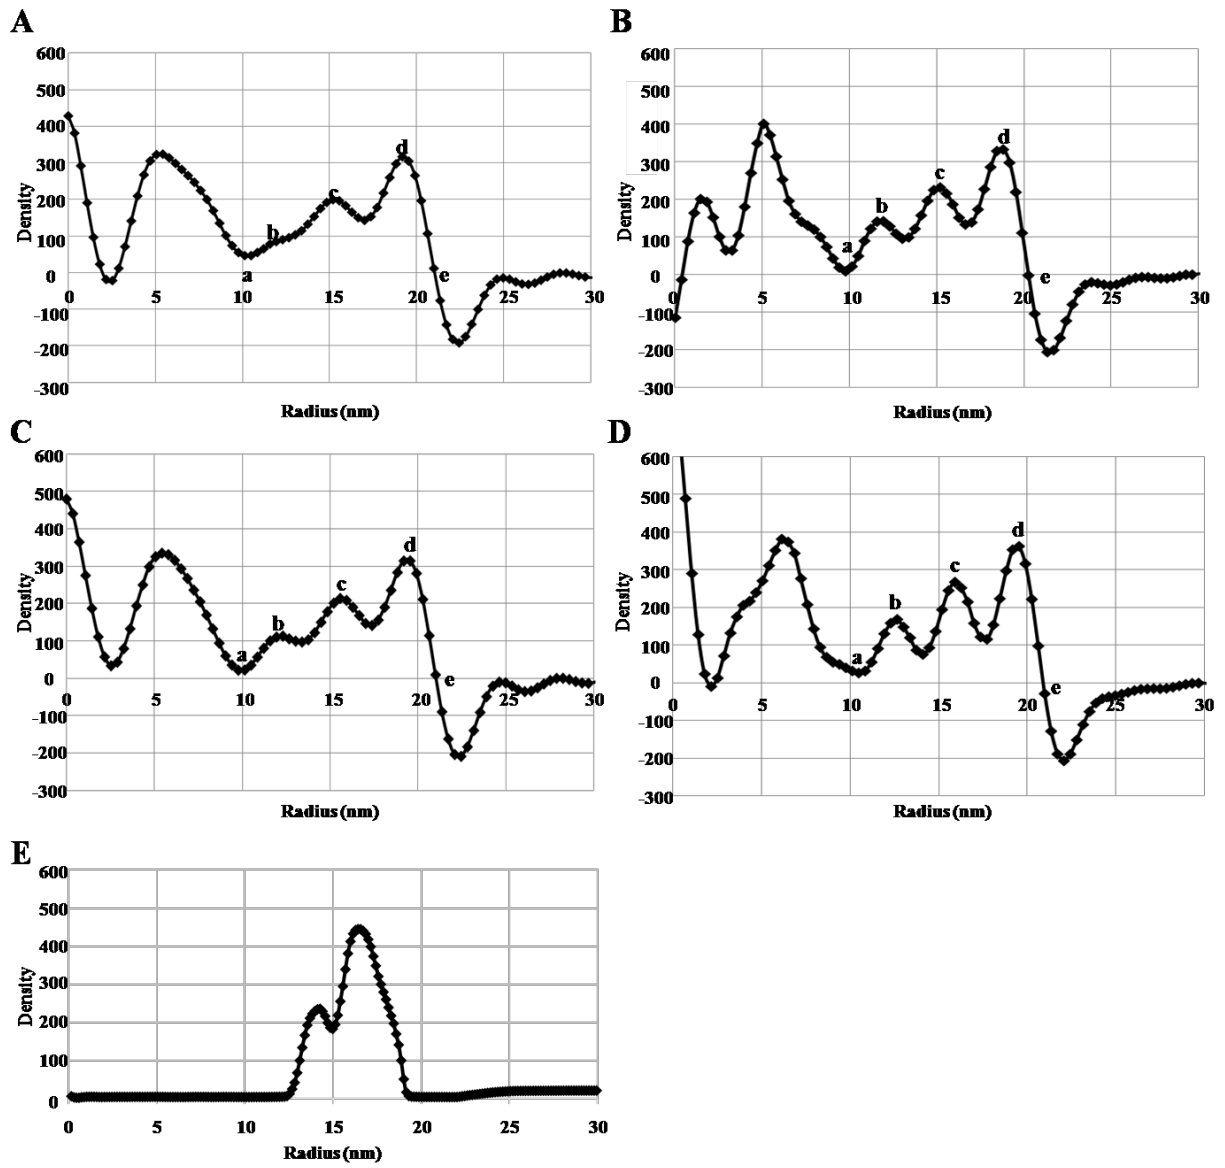

Supplement: NIHMS224004-supplement-01.pdf [file NIHMS224004-supplement-01.pdf]
